# Supplementary material
Source: PubMed Central journal article supplement (PMC4114989)
Supplement: NIHMS606801-supplement-01.pdf [file NIHMS606801-supplement-01.pdf]

**Table II.** Primer Sets for RT-qPCR experiments (supplemental)

| <b>Transcript name<br/>(Gene/protein)</b> | <b>Forward (5' to 3')</b>         | <b>Reverse (5' to 3')</b>             |
|-------------------------------------------|-----------------------------------|---------------------------------------|
| <b>18S</b>                                | GCCGCTAGAGGTGAAATTCTT             | CTTTCGCTCTGGTCCGTCTT                  |
| <b>CDS1</b>                               | GAGCACCAGCGACAAAGAA               | AGAATCTCAGGGGTTCTATCTGAG              |
| <b>CDS2</b>                               | CAGTCAGTCATTGGCTGGAA              | GCGAAGAATCCTCCAAAGG                   |
| <b>PGS1 (PGPS)</b>                        | CTACCTGGGGACAGGTCCTT              | TTGCTTGGAGTGACTTTTCTAGAGT             |
| <b>PTPMT1 (PGPP)</b>                      | GGTGGCAGCATACCTGATTC              | ATCTTGGCGATGGCTCTTAC                  |
| <b>CRLS1 (CLS)</b>                        | CCGAACTCTTCCAACACCAC              | CCTTGCTGATGAATGTTGGTT                 |
| <b>HADHA (MLCL-AT)</b>                    | CACCCTCACTGCGCTAGAC               | TTCTTCACTTTGTCATTCAATCCT              |
| <b>TAZ (tafazzin)</b>                     | GAGAACAAGTCGGCTGTGG               | GCTGGAGGTGGTTGTGGA                    |
| <b>PLA2G6</b>                             | ACTGCCACACTCAGATGGATGTCA          | ACCTGAGAATTGTCACCCTGGACA              |
| <b>PNPLA8 (PLA2<math>\gamma</math>)</b>   | ACAAGCCTACAAGTCCTTCTGCGA          | AAAGCTTGTACACCTTCCGTGGGA              |
| <b>MT-ND5</b>                             | ACACTCCAACCTCATGAGACCCACA         | ACCTAATTGGGCTGATTTGCCTGC              |
| <b>MT-ND6</b>                             | GTGTGGTCGGGTGTGTTATTA             | CTCAATAGCCATCGCTGTAGTAT               |
| <b>tRNA-Pro</b>                           | <u>TCAGAGAAAAAGTCTTTAACTCCACC</u> | <u>ATAGTTTAAATTAGAATCTTAGCTTTGGGT</u> |
| <b>tRNA-Val</b>                           | <u>GTGTAGCTTAACACAAAGCACCC</u>    | <u>TCAGAGCGGTCAAGTTAAGTTG</u>         |
| <b>CYTB</b>                               | <u>GCAACACTCCACCTCCTATTC</u>      | <u>AGGGCGTCTTTGATTGTGTAG</u>          |
| <b>COI</b>                                | <u>CTTCGTCTGATCCGTCCTAATC</u>     | <u>TTGAGGTTGCGGTCTGTTAG</u>           |
